# Supplementary material for: Hyperferritinemia and hypergammaglobulinemia predict the treatment response to standard therapy in autoimmune hepatitis
Source: PubMed Central journal article supplement (PMC5464635; doi:10.1371/journal.pone.0179074), 2017-06-08

# S1 Figure

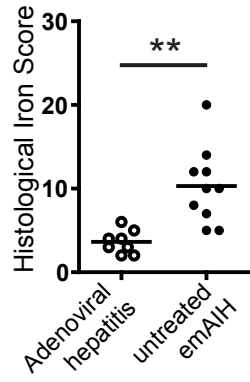

Supplement: pone.0179074.s005.pdf [file pone.0179074.s005.pdf]
